# Supplementary material
Source: ML conference proceedings conference paper supplement (https://openreview.net/forum?id=9ACKEhyS8u)
Supplement: supplementary_material [file attachment]

# Supplementary Material—Unpaired Photo-realistic Image Deraining with Energy-informed Diffusion Model

**Table 1: Quantitative comparisons of our proposed method and the other comparative algorithms on five synthetic testing datasets. The **red** and **blue** font indicate the best and second-best metrical scores, respectively. Our model achieves the best performance in PSNR and SSIM indicators.**

| Method                 | Test100       |               | Test1400      |               | Test1200      |               | Test1188      |               | Test1000      |               | Average       |               |
|------------------------|---------------|---------------|---------------|---------------|---------------|---------------|---------------|---------------|---------------|---------------|---------------|---------------|
|                        | PSNR          | SSIM          |
| CycleGAN               | 22.098        | 0.7378        | 25.108        | 0.7638        | 26.704        | 0.7753        | 20.426        | 0.7430        | 16.302        | 0.6511        | 22.128        | 0.7342        |
| UAGGAN                 | 20.381        | 0.6446        | 21.790        | 0.6851        | 22.091        | 0.6751        | 19.267        | 0.7756        | 22.820        | 0.8299        | 21.270        | 0.7221        |
| CUT                    | 24.108        | 0.7352        | 23.799        | 0.7222        | 23.743        | 0.7573        | 22.683        | 0.8216        | 27.939        | 0.9021        | 24.454        | 0.7877        |
| DCLGAN                 | 19.921        | 0.6368        | 19.727        | 0.6540        | 19.861        | 0.6329        | 20.314        | 0.7639        | 20.566        | 0.7746        | 20.078        | 0.6924        |
| DerainCycleGAN         | 24.257        | <b>0.7802</b> | <b>27.213</b> | <b>0.8379</b> | <b>27.565</b> | <b>0.8133</b> | 18.852        | 0.8211        | 30.197        | <b>0.9294</b> | <b>25.617</b> | <b>0.8364</b> |
| NLCL                   | 20.377        | 0.6971        | 20.257        | 0.7445        | 20.851        | 0.7009        | 20.169        | 0.8373        | 23.480        | 0.8499        | 21.027        | 0.7660        |
| DCD-GAN                | <b>24.324</b> | 0.7333        | 23.696        | 0.7198        | 24.744        | 0.7524        | <b>24.490</b> | 0.8390        | 28.739        | 0.9268        | 25.199        | 0.7943        |
| LUD-VAE                | 21.112        | 0.5353        | 20.329        | 0.4794        | 19.732        | 0.4361        | 16.031        | 0.3852        | 24.432        | 0.4337        | 20.327        | 0.4539        |
| EGSDE                  | 21.563        | 0.7488        | 24.265        | 0.6822        | 24.895        | 0.6204        | 21.225        | 0.6834        | 26.081        | 0.7972        | 23.606        | 0.7064        |
| UNSB                   | 19.925        | 0.5708        | 19.540        | 0.5663        | 20.668        | 0.5752        | 16.302        | 0.6511        | 21.045        | 0.6792        | 19.496        | 0.6085        |
| CLIP-LIT               | 22.636        | 0.7072        | 24.183        | 0.7761        | 23.152        | 0.7377        | 23.952        | <b>0.8415</b> | <b>31.572</b> | <b>0.9425</b> | 25.099        | 0.8010        |
| <b>UPID-EDM (ours)</b> | <b>24.986</b> | <b>0.8035</b> | <b>28.578</b> | <b>0.8627</b> | <b>29.942</b> | <b>0.8582</b> | <b>26.878</b> | <b>0.8554</b> | <b>32.060</b> | 0.8921        | <b>28.489</b> | <b>0.8544</b> |
